# Supplementary material
Source: PubMed Central journal article supplement (PMC2860804)
Supplement: NIHMS166857-supplement-Supp1.pdf [file NIHMS166857-supplement-Supp1.pdf]

## SUPPLEMENTAL MATERIAL

### Normal values

Data from 398 normal subjects who had analysis of the number of PVCs per 24 hours by Holter monitor were contributed by Dr. S. DePaula, University Sao Paulo Medical School, Brazil.

Holter normals n = 398: 181 males, 217 females, age  $43.5 \pm 12.2$ , range 15 to 83

Holter ARVD probands n = 68: 37 males, 31 females, age  $37.1 \pm 13.3$ , range 15 to 63

There were 462 normal subjects who were the basis for the MRI data. These were provided by Drs. D. Bluemke and H. Tandri of Johns Hopkins Hospital, Baltimore, MD.

MRI data normals n = 462

263 males: age  $60.2 \pm 10$

RVEDV/BSA  $63.6 \pm 11$  ml/m<sup>2</sup>

RVEF  $61.9 \pm 8.4$  %

199 females: age  $60.6 \pm 10$

RVEDV/BSA  $72.8 \pm 14.2$  ml/m<sup>2</sup>

RVEF  $68.5 \pm 7.5$  %

MRI data ARVC/D probands n = 44

Males: age  $41.3 \pm 13.9$

n = 27 RVEDV/BSA  $96.6 \pm 37.6$  ml/m<sup>2</sup> n = 28 RVEF  $42 \pm 12.3$  %

Females: age  $39.6 \pm 11.5$

n = 14 RVEDV/BSA  $98 \pm 38.2$  ml/m<sup>2</sup> n = 16 RVEF  $44 \pm 13.1$  %

Echocardiographic data from 150 normal subjects were provided by Drs. M. Picard and D. Sanborn of the Massachusetts General Hospital, Boston, Massachusetts and 300 normal echocardiograms by Drs. A. Nava and B. Bauce from the University of Padua, Italy.

Echo normals: n=450, 241 males, 209 females, age  $32 \pm 12.8$

RVOT (PLAX)  $25.8 \pm 4$                       RVOT (PSAX)  $28.9 \pm 4.3$ ,                      FAC  $47.2 \pm 10.3$

Echo data ARVC/D probands: n = 69, 38 males, 31 females, age  $37.17 \pm 13.7$

RVOT (PLAX)  $36.5 \pm 6.8$ .                      RVOT (PSAX)  $37.5 \pm 5.2$ .                      FAC  $33.3 \pm 8.3$

Dr. W. Zareba of the University of Rochester provided information on the signal averaged ECGs from 20 normals and Dr. W. McKenna of the Heart Hospital, London, UK contributed data on 83 normal signal averaged electrocardiograms.

SAECG normals n = 103: 44 males 59 females  $33 \pm 14$ , range 10 to 73

SAECG ARVC/D probands n = 69: 37 males, 32 females, age  $37 \pm 13$ , range 15 to 62
